# Supplementary material for: Peptide directed synthesis of silica coated gold nanocables
Source: Royal Society of Chemistry journal article supplement (doi:10.1039/c0cc00408a), 2010-01-01
Supplement: c0cc00408a.pdf [file c0cc00408a.pdf]

# 1 Peptide Directed Synthesis of Silica Coated Gold Nanocables

2  
3 Jungok Kim,<sup>a</sup> Nosang V. Myung<sup>\*b</sup> and Hor-Gil Hur<sup>\*a</sup>

## 4 5 **Supporting Information**

### 6 7 **Materials and Experimental procedures**

#### 8 Chemicals and peptides:

9 H<sub>2</sub>AuCl<sub>4</sub>·3H<sub>2</sub>O and TMOS were purchased from Aldrich (St. Louis, MO). Nanopure water used  
10 was prepared by using the Milli-Q system (Millipore, Billerica, MA) and autoclaved to avoid  
11 microbial contamination. All peptides used were purchased from Any Gen Co. Ltd. (Gwangju,  
12 Korea).

#### 13 14 Synthesis of gold nanoribbons and nanoplatelets:

15 All procedures for synthesis of the gold nanoribbons and nanoplatelets were followed by  
16 previous description.<sup>1</sup> The gold nanoribbons were synthesized by 0.2 mg/ml of the peptide  
17 Midas-11 dissolved in deionized water with 30 mM of H<sub>2</sub>AuCl<sub>4</sub> at pH 5.4 for 3 d incubation at  
18 37 °C in the absence of light. The initial pH condition was adjusted with 5 M NaOH prior to  
19 the addition of the peptide solution into deionized water containing H<sub>2</sub>AuCl<sub>4</sub>. The gold  
20 nanoplatelets were synthesized by 0.2 mg/ml of the peptide Midas-11<sub>C</sub> dissolved in deionized  
21 water with 0.5 mM of H<sub>2</sub>AuCl<sub>4</sub> at pH 3.0 for 3 d incubation at 37 °C in the absence of light. All  
22 reaction volume was 1 ml. After reaction, samples were centrifuged (9,300 x g, 5 min), washed

1 twice and re-suspended with 100  $\mu$ l of deionized water.

2

3 Attachment of peptide to gold nanostructures: The synthesized template gold nanoribbon (50  
4  $\mu$ l) and the gold nanoplatelet (10  $\mu$ l) were incubated with 1 mg of the peptide Si#6-C for 24 hr  
5 at room temperature. After 24 hr incubation, supernatants which contain the unbounded peptide  
6 Si#6-C were discarded by centrifugation at 9,300 x g for 5 min (Centrifuge 5415D, Fisher  
7 Scientific, Pittsburgh, PA).

8

9 Covering gold nanostructures with silica: The gold nanoribbons and nanoplatelets bound by the  
10 peptide Si#6-C were reacted in 50 mM phosphate buffer (pH 7.5) with 50 mM of TMOS for 3  
11 hr at 20 °C to form silica layers. Stock solution of TMOS was freshly prepared in 1 M  
12 dissolved in 1 mM HCl. After reactions, samples were washed twice with deionized water and  
13 resuspended in deionized water for further analyses.

14

15 Binding affinity test of peptide Si#6-C with fluorescent dye-labeled: The synthesized gold  
16 nanoribbons were incubated with 1 mg of the peptide FAM-Si#6 or FAM-Si#6-C for 24 hr at  
17 room temperature. After reactions, samples were centrifuged and washed twice with deionized  
18 water. Light intensity for binding affinity of the designed peptides was analyzed by CLSM  
19 (LSM5, Zeiss, Germany).

20

21 Characterization of materials: The synthesized nanocables and nanoplatelets were characterized  
22 by SEM, FE-TEM, EDX, and AFM. The samples for SEM analyses using Hitachi S-4700

1 (Tokyo, Japan) at an accelerating voltage of 10 kV were prepared by placing ~5  $\mu$ L of the  
2 suspension and drying in the air on a silicon wafer. The SEM samples were also subjected to  
3 AFM analyses using NanoMan D-3100 (Veeco, Plainview, NY). TEM analyses were conducted  
4 on a Tecnai F20 FE-TEM (Philips Electron Optics, Eindhoven, The Netherlands) at an  
5 accelerating voltage of 200 kV equipped with EDX. The samples were prepared by depositing  
6 a droplet of water suspension of the gold crystals onto carbon-coated Cu support grids that  
7 were subsequently dried in air.

8

9

## 10 **Reference**

- 11 1. J. Kim, Y. Rheem, B. Yoo, Y. Chong, K. N. Bozhilov, D. Kim, M. J. Sadowsky, H.-G.  
12 Hur and N. V. Myung, *Acta Biomater.*, 2010, in press.

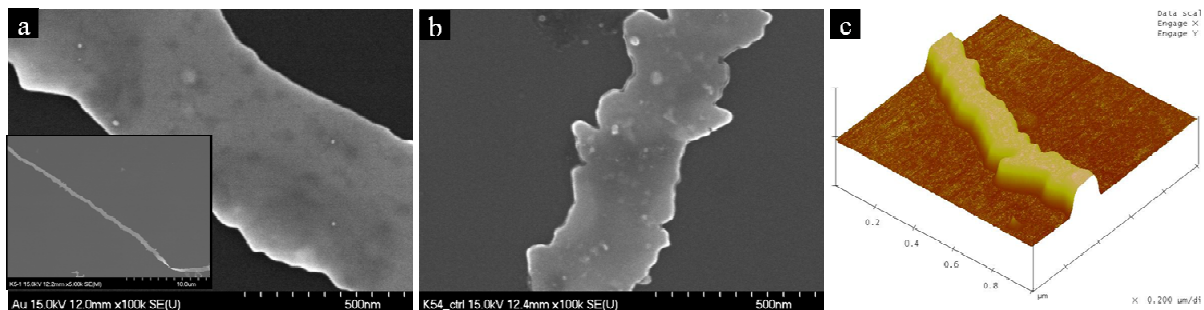

1  
2 **Supplementary Fig. S1.** (a) SEM images of bare gold nanoribbon formed by peptide Midas-11,  
3 and (b) bare gold nanoribbon reacted with precursor TMOS without peptide Si#6-C, and (c)  
4 AFM image of bare gold nanoribbon formed by peptide Midas-11.

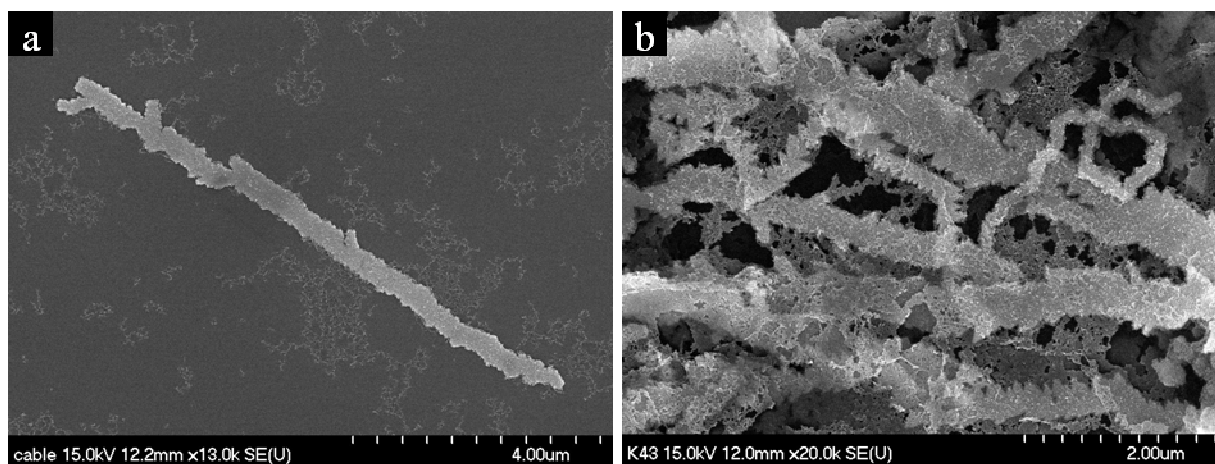

7  
8 **Supplementary Fig. S2.** (a) SEM images of a whole view of a single nanocable coated by  
9 silica and (b) nanocables coated by silica in a single reaction.

10
